# Supplementary material for: Transcriptome Analysis Reveals Complex Defensive Mechanisms in Salt-Tolerant and Salt-Sensitive Shrub Willow Genotypes under Salinity Stress
Source: Int J Genomics. 2020 Jul 27;2020:6870157. doi: 10.1155/2020/6870157 (PMC7407064; doi:10.1155/2020/6870157)
Supplement: Supplementary 4 — Table S4: DEGs encoding cell wall-related proteins under salinity stress. [file 6870157.f4.xlsx]

## Sheet: Sheet1
Table S4. DEGs encoding cell wall-related proteins under salinity stress.
	JW9-6 0 h vs. 2 h		JW9-6 0 h vs. 12 h		JW2372 0 h vs. 2 h		JW2372 0 h vs. 12 h
Gene ID	Fold change	q-value	Fold change	q-value	Fold change	q-value	Fold change	q-value	BINCODE	NAME	DESCRIPTION
SapurV1A.0332s0070	2.55024	1.58659e-83			3.2882	1.07247e-09	3.08548	6.85577e-19	'10.1.6'	'cell wall.precursor synthesis.GAE'	'(at4g30440 : 707.0) UDP-D-glucuronate 4-epimerase; UDP-D-glucuronate 4-epimerase 1 (GAE1); FUNCTIONS IN: UDP-glucuronate 4-epimerase activity, catalytic activity; INVOLVED IN: cellular metabolic process, carbohydrate metabolic process, nucleotide-sugar metabolic process, metabolic process; LOCATED IN: cellular_component unknown; EXPRESSED IN: 24 plant structures; EXPRESSED DURING: 15 growth stag…
SapurV1A.0220s0190	-5.40689	1.43753e-77	-3.07659	2.92369e-30	8.55288	3.9413e-05			'10.2.1'	'cell wall.cellulose synthesis.cellulose synthase'	'(at1g55850 : 763.0) encodes a protein similar to cellulose synthase; cellulose synthase like E1 (CSLE1); FUNCTIONS IN: cellulose synthase activity, transferase activity, transferring glycosyl groups; INVOLVED IN: plant-type cell wall biogenesis, cellulose biosynthetic process, polysaccharide biosynthetic process; LOCATED IN: endoplasmic reticulum, plasma membrane; EXPRESSED IN: 24 plant structur…
SapurV1A.0369s0390	-3.83758	3.92991e-09							'10.3'	'cell wall.hemicellulose synthesis'	'(gnl|cdd|66898 : 576.0) no description available & (q9m5q1|fut1_pea : 504.0) Galactoside 2-alpha-L-fucosyltransferase (EC 2.4.1.69) (Xyloglucan alpha-(1,2)-fucosyltransferase) (PsFT1) - Pisum sativum (Garden pea) & (at2g03220 : 496.0) member of Glycosyltransferase Family- 37; fucosyltransferase 1 (FT1); FUNCTIONS IN: transferase activity, transferring glycosyl groups, fucosyltransferase activity…
SapurV1A.1287s0040					4.15384	0.00106301	3.74068	5.64188e-07	'10.3.2'	'cell wall.hemicellulose synthesis.glucuronoxylan'	'(at3g50760 : 439.0) Encodes a protein with putative galacturonosyltransferase activity.; galacturonosyltransferase-like 2 (GATL2); FUNCTIONS IN: transferase activity, transferring hexosyl groups, polygalacturonate 4-alpha-galacturonosyltransferase activity, transferase activity, transferring glycosyl groups; INVOLVED IN: carbohydrate biosynthetic process; LOCATED IN: endomembrane system; EXPRESS…
SapurV1A.3722s0020					4.4991	0.00472111	4.79857	8.94217e-08	'10.3.2'	cell wall.hemicellulose synthesis.glucuronoxylan'	'(at3g50760 : 439.0) Encodes a protein with putative galacturonosyltransferase activity.; galacturonosyltransferase-like 2 (GATL2); FUNCTIONS IN: transferase activity, transferring hexosyl groups, polygalacturonate 4-alpha-galacturonosyltransferase activity, transferase activity, transferring glycosyl groups; INVOLVED IN: carbohydrate biosynthetic process; LOCATED IN: endomembrane system; EXPRESS…
SapurV1A.1170s0070							2.50899	3.41826e-06	'10.5'	'cell wall.cell wall proteins'	'(at3g48530 : 555.0) SNF1-related protein kinase regulatory subunit gamma 1 (KING1); FUNCTIONS IN: molecular_function unknown; INVOLVED IN: biological_process unknown; LOCATED IN: plant-type cell wall; EXPRESSED IN: 23 plant structures; EXPRESSED DURING: 13 growth stages; CONTAINS InterPro DOMAIN/s: Cystathionine beta-synthase, core (InterPro:IPR000644); BEST Arabidopsis thaliana protein match is…
SapurV1A.0216s0260	3.30731	4.87495e-06							'10.5.1.1'	'cell wall.cell wall proteins.AGPs.AGP'	'(at5g60490 : 167.0) FASCICLIN-like arabinogalactan-protein 12 (FLA12); LOCATED IN: plasma membrane, anchored to membrane; EXPRESSED IN: 22 plant structures; EXPRESSED DURING: 13 growth stages; CONTAINS InterPro DOMAIN/s: FAS1 domain (InterPro:IPR000782); BEST Arabidopsis thaliana protein match is: FASCICLIN-like arabinogalactan-protein 11 (TAIR:AT5G03170.1); Has 1807 Blast hits to 1807 proteins …
SapurV1A.0001s2200							5.27192	1.25545e-07	'10.5.3'	'cell wall.cell wall proteins.LRR'	'(at1g62440 : 534.0) encodes a paralog of LRX1 (LEUCINE-RICH REPEAT/EXTENSIN 1) which acts synergistically with LRX1 in root hair cell morphogenesis.; leucine-rich repeat/extensin 2 (LRX2); CONTAINS InterPro DOMAIN/s: Leucine-rich repeat-containing N-terminal domain, type 2 (InterPro:IPR013210), Leucine-rich repeat (InterPro:IPR001611); BEST Arabidopsis thaliana protein match is: leucine-rich rep…
SapurV1A.0822s0110	3.44417	0.000602516							'10.6.1'	'cell wall.degradation.cellulases and beta -1,4-glucanases'	'(at5g20950 : 913.0) Glycosyl hydrolase family protein; FUNCTIONS IN: hydrolase activity, hydrolyzing O-glycosyl compounds; INVOLVED IN: carbohydrate metabolic process; LOCATED IN: cell wall, membrane, plant-type cell wall; EXPRESSED IN: 25 plant structures; EXPRESSED DURING: 13 growth stages; CONTAINS InterPro DOMAIN/s: Glycoside hydrolase, family 3, N-terminal (InterPro:IPR001764), Glycoside hy…
SapurV1A.0088s0050					3.81836	0.00348382	5.50975	1.66874e-08	'10.6.2'	'cell wall.degradation.mannan-xylose-arabinose-fucose'	'(at4g25810 : 419.0) xyloglucan endotransglycosylase-related protein (XTR6); xyloglucan endotransglycosylase 6 (XTR6); FUNCTIONS IN: hydrolase activity, acting on glycosyl bonds, xyloglucan:xyloglucosyl transferase activity, hydrolase activity, hydrolyzing O-glycosyl compounds; INVOLVED IN: carbohydrate metabolic process, cellular glucan metabolic process; LOCATED IN: cell wall; EXPRESSED IN: 14 …
SapurV1A.0198s0180					4.0943	0.0175333	4.18531	3.2564e-05	'10.6.2'	'cell wall.degradation.mannan-xylose-arabinose-fucose'	'(at4g25810 : 377.0) xyloglucan endotransglycosylase-related protein (XTR6); xyloglucan endotransglycosylase 6 (XTR6); FUNCTIONS IN: hydrolase activity, acting on glycosyl bonds, xyloglucan:xyloglucosyl transferase activity, hydrolase activity, hydrolyzing O-glycosyl compounds; INVOLVED IN: carbohydrate metabolic process, cellular glucan metabolic process; LOCATED IN: cell wall; EXPRESSED IN: 14 …
SapurV1A.0271s0200	4.11137	3.72131e-23	2.83777	1.15043e-05	5.97084	4.5309e-10			'10.6.2'	'cell wall.degradation.mannan-xylose-arabinose-fucose'	'(at4g25810 : 310.0) xyloglucan endotransglycosylase-related protein (XTR6); xyloglucan endotransglycosylase 6 (XTR6); FUNCTIONS IN: hydrolase activity, acting on glycosyl bonds, xyloglucan:xyloglucosyl transferase activity, hydrolase activity, hydrolyzing O-glycosyl compounds; INVOLVED IN: carbohydrate metabolic process, cellular glucan metabolic process; LOCATED IN: cell wall; EXPRESSED IN: 14 …
SapurV1A.0809s0070			-3.39944	2.23971e-05					'10.6.2'	'cell wall.degradation.mannan-xylose-arabinose-fucose'	'(at5g64570 : 1103.0) Encodes a beta-d-xylosidase that belongs to family 3 of glycoside hydrolases.; beta-D-xylosidase 4 (XYL4); FUNCTIONS IN: xylan 1,4-beta-xylosidase activity, hydrolase activity, hydrolyzing O-glycosyl compounds; INVOLVED IN: xylan catabolic process; LOCATED IN: apoplast, cell wall; EXPRESSED IN: 24 plant structures; EXPRESSED DURING: 13 growth stages; CONTAINS InterPro DOMAIN…
SapurV1A.0060s0160							-2.21878	5.62195e-14	'10.6.2'	'cell wall.degradation.mannan-xylose-arabinose-fucose'	'(at5g49360 : 1122.0) Encodes a bifunctional {beta}-D-xylosidase/{alpha}-L-arabinofuranosidase required for pectic arabinan modification. Located in the extracellular matrix. Gene is expressed specifically in tissues undergoing secondary wall thickening. This is a member of glycosyl hydrolase family 3 and has six other closely related members.; beta-xylosidase 1 (BXL1); FUNCTIONS IN: alpha-N-arab…
SapurV1A.0037s0200					3.43826	0.0189431			'10.6.3'	'cell wall.degradation.pectate lyases and polygalacturonases'	'(p35336|pglr_actch : 519.0) Polygalacturonase precursor (EC 3.2.1.15) (PG) (Pectinase) - Actinidia chinensis (Kiwi) (Yangtao) & (at3g07970 : 402.0) Required for pollen separation during normal development. In qrt mutants, the outer walls of the four meiotic products of the pollen mother cell are fused, and pollen grains are released in tetrads.May be required for cell type-specific pectin degrad…
SapurV1A.0206s0360					2.82963	0.0134967			'10.6.3'	'cell wall.degradation.pectate lyases and polygalacturonases'	'(at1g67750 : 496.0) Pectate lyase family protein; FUNCTIONS IN: pectate lyase activity; INVOLVED IN: biological_process unknown; LOCATED IN: endomembrane system; EXPRESSED IN: 21 plant structures; EXPRESSED DURING: 13 growth stages; CONTAINS InterPro DOMAIN/s: Pectin lyase fold/virulence factor (InterPro:IPR011050), AmbAllergen (InterPro:IPR018082), Pectate lyase/Amb allergen (InterPro:IPR002022…
SapurV1A.0589s0180					3.73437	0.00863375			'10.6.3'	'cell wall.degradation.pectate lyases and polygalacturonases'	'(at3g53190 : 626.0) Pectin lyase-like superfamily protein; CONTAINS InterPro DOMAIN/s: Pectin lyase fold/virulence factor (InterPro:IPR011050), AmbAllergen (InterPro:IPR018082), Pectate lyase/Amb allergen (InterPro:IPR002022), Pectin lyase fold (InterPro:IPR012334); BEST Arabidopsis thaliana protein match is: Pectin lyase-like superfamily protein (TAIR:AT5G04310.1); Has 1735 Blast hits to 1728 p…
SapurV1A.1059s0090					3.92076	0.00215894			'10.6.3'	'cell wall.degradation.pectate lyases and polygalacturonases'	'(at3g53190 : 681.0) Pectin lyase-like superfamily protein; CONTAINS InterPro DOMAIN/s: Pectin lyase fold/virulence factor (InterPro:IPR011050), AmbAllergen (InterPro:IPR018082), Pectate lyase/Amb allergen (InterPro:IPR002022), Pectin lyase fold (InterPro:IPR012334); BEST Arabidopsis thaliana protein match is: Pectin lyase-like superfamily protein (TAIR:AT5G04310.1); Has 1735 Blast hits to 1728 p…
SapurV1A.0004s0690	3.25753	0.000193962							'10.6.3'	'cell wall.degradation.pectate lyases and polygalacturonases'	'(at4g24430 : 917.0) Rhamnogalacturonate lyase family protein; FUNCTIONS IN: lyase activity; INVOLVED IN: biological_process unknown; LOCATED IN: plasma membrane; EXPRESSED IN: 9 plant structures; EXPRESSED DURING: 4 anthesis, petal differentiation and expansion stage; CONTAINS InterPro DOMAIN/s: Rhamnogalacturonate lyase (InterPro:IPR010325), Carbohydrate-binding-like fold (InterPro:IPR013784), …
SapurV1A.0071s0610	3.0041	1.07987e-08							'10.6.3'	'cell wall.degradation.pectate lyases and polygalacturonases'	'(at3g07010 : 646.0) Pectin lyase-like superfamily protein; FUNCTIONS IN: lyase activity, pectate lyase activity; INVOLVED IN: biological_process unknown; LOCATED IN: endomembrane system; EXPRESSED IN: 22 plant structures; EXPRESSED DURING: 13 growth stages; CONTAINS InterPro DOMAIN/s: Pectin lyase fold/virulence factor (InterPro:IPR011050), AmbAllergen (InterPro:IPR018082), Pectate lyase/Amb all…
SapurV1A.0264s0080	12.8887	7.02071e-05							'10.6.3'	'cell wall.degradation.pectate lyases and polygalacturonases'	'(at1g02790 : 294.0) encodes a exopolygalacturonase.; polygalacturonase 4 (PGA4); FUNCTIONS IN: polygalacturonase activity; INVOLVED IN: carbohydrate metabolic process; LOCATED IN: endomembrane system; EXPRESSED IN: 14 plant structures; EXPRESSED DURING: 6 growth stages; CONTAINS InterPro DOMAIN/s: Pectin lyase fold/virulence factor (InterPro:IPR011050), Pectin lyase fold (InterPro:IPR012334), Gl…
SapurV1A.0692s0030	2.31408	4.01231e-25							'10.6.3'	'cell wall.degradation.pectate lyases and polygalacturonases'	'(at5g63180 : 375.0) Pectin lyase-like superfamily protein; CONTAINS InterPro DOMAIN/s: Pectin lyase fold/virulence factor (InterPro:IPR011050), AmbAllergen (InterPro:IPR018082), Pectate lyase/Amb allergen (InterPro:IPR002022), Pectin lyase fold (InterPro:IPR012334), Parallel beta-helix repeat (InterPro:IPR006626); BEST Arabidopsis thaliana protein match is: Pectin lyase-like superfamily protein …
SapurV1A.1368s0080	2.99975	2.99007e-05							'10.6.3'	'cell wall.degradation.pectate lyases and polygalacturonases'	'(at2g22620 : 503.0) Rhamnogalacturonate lyase family protein; CONTAINS InterPro DOMAIN/s: Rhamnogalacturonate lyase (InterPro:IPR010325), Carbohydrate-binding-like fold (InterPro:IPR013784), Galactose-binding domain-like (InterPro:IPR008979); BEST Arabidopsis thaliana protein match is: Rhamnogalacturonate lyase family protein (TAIR:AT4G37950.1). & (reliability: 1006.0) & (original description: n…
SapurV1A.0107s0210							7.03506	1.53882e-05	'10.7'	'cell wall.modification'	'(at4g17030 : 298.0) Encodes EXLB1 (expansin-like B1), a member of the expansin family.; expansin-like B1 (EXLB1); INVOLVED IN: sexual reproduction, unidimensional cell growth, plant-type cell wall loosening; LOCATED IN: endomembrane system, extracellular region; EXPRESSED IN: 19 plant structures; EXPRESSED DURING: 9 growth stages; CONTAINS InterPro DOMAIN/s: Pollen allergen, N-terminal (InterPro…
SapurV1A.4684s0010							2.0576	4.13054e-30	'10.7'	'cell wall.modification'	'(at1g69530 : 328.0) Member of Alpha-Expansin Gene Family. Naming convention from the Expansin Working Group (Kende et al, Plant Mol Bio). Involved in the formation of nematode-induced syncytia in roots of Arabidopsis thaliana.; expansin A1 (EXPA1); CONTAINS InterPro DOMAIN/s: Pollen allergen, N-terminal (InterPro:IPR014734), Rare lipoprotein A (InterPro:IPR005132), Pollen allergen/expansin, C-te…
SapurV1A.0122s0160					2.97182	0.000137525			'10.7'	'cell wall.modification'	'(q8lnz5|xthb_phaan : 520.0) Probable xyloglucan endotransglucosylase/hydrolase protein B precursor (EC 2.4.1.207) (VaXTH2) - Phaseolus angularis (Adzuki bean) (Vigna angularis) & (at5g13870 : 498.0) EXGT-A4, endoxyloglucan transferase,; xyloglucan endotransglucosylase/hydrolase 5 (XTH5); FUNCTIONS IN: hydrolase activity, acting on glycosyl bonds, hydrolase activity, hydrolyzing O-glycosyl compou…
SapurV1A.0222s0450					3.15048	0.00873165			'10.7'	'cell wall.modification'	'(at4g03210 : 440.0) encodes a member of xyloglucan endotransglucosylase/hydrolases (XTHs) that catalyze the cleavage and molecular grafting of xyloglucan chains function in loosening and rearrangement of the cell wall. Gene is expressed in shoot apex region, flower buds, flower stalks and internodes bearing flowers.; xyloglucan endotransglucosylase/hydrolase 9 (XTH9); FUNCTIONS IN: hydrolase act…
SapurV1A.0948s0030					5.38468	3.51593e-05			'10.7'	'cell wall.modification'	'(at4g14130 : 425.0) xyloglucan endotransglycosylase-related protein (XTR7); xyloglucan endotransglucosylase/hydrolase 15 (XTH15); FUNCTIONS IN: hydrolase activity, acting on glycosyl bonds, xyloglucan:xyloglucosyl transferase activity, hydrolase activity, hydrolyzing O-glycosyl compounds; INVOLVED IN: N-terminal protein myristoylation, carbohydrate metabolic process, cellular glucan metabolic pr…
SapurV1A.1305s0070	-3.76044	9.3755e-181			2.86996	0.00270506			'10.7'	'cell wall.modification'	'(at4g03210 : 89.7) encodes a member of xyloglucan endotransglucosylase/hydrolases (XTHs) that catalyze the cleavage and molecular grafting of xyloglucan chains function in loosening and rearrangement of the cell wall. Gene is expressed in shoot apex region, flower buds, flower stalks and internodes bearing flowers.; xyloglucan endotransglucosylase/hydrolase 9 (XTH9); FUNCTIONS IN: hydrolase acti…
SapurV1A.1733s0010					3.23313	0.0156287			'10.7'	'cell wall.modification'	'(at4g14130 : 428.0) xyloglucan endotransglycosylase-related protein (XTR7); xyloglucan endotransglucosylase/hydrolase 15 (XTH15); FUNCTIONS IN: hydrolase activity, acting on glycosyl bonds, xyloglucan:xyloglucosyl transferase activity, hydrolase activity, hydrolyzing O-glycosyl compounds; INVOLVED IN: N-terminal protein myristoylation, carbohydrate metabolic process, cellular glucan metabolic pr…
SapurV1A.0071s0390	-2.12752	1.03801e-21							'10.7'	cell wall.modification'	'(p35694|bru1_soybn : 458.0) Brassinosteroid-regulated protein BRU1 precursor - Glycine max (Soybean) & (at3g23730 : 430.0) xyloglucan endotransglucosylase/hydrolase 16 (XTH16); FUNCTIONS IN: hydrolase activity, acting on glycosyl bonds, hydrolase activity, hydrolyzing O-glycosyl compounds, xyloglucan:xyloglucosyl transferase activity; INVOLVED IN: carbohydrate metabolic process, cellular glucan …
SapurV1A.5351s0010	-2.43268	5.43597e-05							'10.7'	'cell wall.modification'	'(at1g10550 : 388.0) Encodes a membrane-localized protein that is predicted to function during cell wall modification.Overexpression of XTH33 results in abnormal cell morphology. It's expression is under epigenetic control by ATX1.; xyloglucan:xyloglucosyl transferase 33 (XTH33); FUNCTIONS IN: hydrolase activity, acting on glycosyl bonds, hydrolase activity, hydrolyzing O-glycosyl compounds, xylo…
SapurV1A.0433s0230	-2.4979	9.60959e-08							'10.7'	'cell wall.modification'	'(at4g03210 : 391.0) encodes a member of xyloglucan endotransglucosylase/hydrolases (XTHs) that catalyze the cleavage and molecular grafting of xyloglucan chains function in loosening and rearrangement of the cell wall. Gene is expressed in shoot apex region, flower buds, flower stalks and internodes bearing flowers.; xyloglucan endotransglucosylase/hydrolase 9 (XTH9); FUNCTIONS IN: hydrolase act…
SapurV1A.0732s0010			-3.76495	4.1652e-05					'10.7'	'cell wall.modification'	'(at2g03090 : 308.0) member of Alpha-Expansin Gene Family. Naming convention from the Expansin Working Group (Kende et al, 2004. Plant Mol Bio). Involved in the formation of nematode-induced syncytia in roots of Arabidopsis thaliana.; expansin A15 (EXPA15); INVOLVED IN: plant-type cell wall modification involved in multidimensional cell growth, syncytium formation, unidimensional cell growth, pla…
SapurV1A.2107s0020			-3.85969	1.76984e-05					'10.7'	'cell wall.modification'	'(at2g03090 : 320.0) member of Alpha-Expansin Gene Family. Naming convention from the Expansin Working Group (Kende et al, 2004. Plant Mol Bio). Involved in the formation of nematode-induced syncytia in roots of Arabidopsis thaliana.; expansin A15 (EXPA15); INVOLVED IN: plant-type cell wall modification involved in multidimensional cell growth, syncytium formation, unidimensional cell growth, pla…
SapurV1A.0569s0190	2.48807	2.30577e-17							'10.8.1'	'cell wall.pectin*esterases.PME'	'(at5g19730 : 401.0) Pectin lyase-like superfamily protein; FUNCTIONS IN: pectinesterase activity; INVOLVED IN: cell wall modification; LOCATED IN: cell wall, plant-type cell wall, cytoplasm; EXPRESSED IN: 17 plant structures; EXPRESSED DURING: 8 growth stages; CONTAINS InterPro DOMAIN/s: Pectinesterase, active site (InterPro:IPR018040), Pectin lyase fold/virulence factor (InterPro:IPR011050), Pe…
SapurV1A.0570s0060	2.0956	5.48251e-90							'10.8.1'	'cell wall.pectin*esterases.PME'	'(at3g59010 : 519.0) pectin methylesterase 61 (PME61); FUNCTIONS IN: enzyme inhibitor activity, pectinesterase activity; INVOLVED IN: cell wall modification; LOCATED IN: cell wall, plant-type cell wall; EXPRESSED IN: 19 plant structures; EXPRESSED DURING: 13 growth stages; CONTAINS InterPro DOMAIN/s: Pectinesterase, active site (InterPro:IPR018040), Pectin lyase fold/virulence factor (InterPro:IP…
SapurV1A.0570s0080	2.0956	5.48251e-90							'10.8.1'	'cell wall.pectin*esterases.PME'	'(at3g59010 : 510.0) pectin methylesterase 61 (PME61); FUNCTIONS IN: enzyme inhibitor activity, pectinesterase activity; INVOLVED IN: cell wall modification; LOCATED IN: cell wall, plant-type cell wall; EXPRESSED IN: 19 plant structures; EXPRESSED DURING: 13 growth stages; CONTAINS InterPro DOMAIN/s: Pectinesterase, active site (InterPro:IPR018040), Pectin lyase fold/virulence factor (InterPro:IP…
SapurV1A.1710s0020	2.37013	9.20593e-16							'10.8.1'	'cell wall.pectin*esterases.PME'	'(at5g19730 : 462.0) Pectin lyase-like superfamily protein; FUNCTIONS IN: pectinesterase activity; INVOLVED IN: cell wall modification; LOCATED IN: cell wall, plant-type cell wall, cytoplasm; EXPRESSED IN: 17 plant structures; EXPRESSED DURING: 8 growth stages; CONTAINS InterPro DOMAIN/s: Pectinesterase, active site (InterPro:IPR018040), Pectin lyase fold/virulence factor (InterPro:IPR011050), Pe…
SapurV1A.2052s0010	2.22099	1.16782e-104							'10.8.1'	'cell wall.pectin*esterases.PME'	'(at3g59010 : 510.0) pectin methylesterase 61 (PME61); FUNCTIONS IN: enzyme inhibitor activity, pectinesterase activity; INVOLVED IN: cell wall modification; LOCATED IN: cell wall, plant-type cell wall; EXPRESSED IN: 19 plant structures; EXPRESSED DURING: 13 growth stages; CONTAINS InterPro DOMAIN/s: Pectinesterase, active site (InterPro:IPR018040), Pectin lyase fold/virulence factor (InterPro:IP…
